# Supplementary material for: Experimental and geochemical simulation of nickel carbonate mineral precipitation by carbonate-laden ureolytic fungal culture supernatants
Source: Royal Society of Chemistry journal article supplement (doi:10.1039/c9en00385a), 2019-01-01
Supplement: c9en00385a1.pdf [file c9en00385a1.pdf]

## Supporting Information

### **Experimental and geochemical simulation of nickel carbonate mineral precipitation by carbonate-laden ureolytic fungal culture supernatants**

Qianwei Li<sup>\*a,b,#</sup>, Daoqing Liu<sup>c,#</sup>, Chunmao Chen<sup>\*b</sup>, Zhiguo Shao<sup>a</sup>, Huazhen Wang<sup>b</sup>,

Jicheng Liu<sup>b</sup>, Qiangbin Zhang<sup>b</sup>, Geoffrey Michael Gadd<sup>d</sup>

## Methods

### Quantification of polysaccharides produced by fungi

The concentration of polysaccharide in fungal supernatant before and after mixture with NiCl<sub>2</sub> solution was measured using the Phenol-Sulfuric acid method, following the basic protocol of Dubois et al.<sup>1</sup>.

**Table S1. Proportion of polysaccharide removed after mixture of fungal growth supernatant and 50 mM NiCl<sub>2</sub>.**

| Mixture ratio<br>(V <sub>s</sub> : V <sub>m</sub> ) | Removal of polysaccharide (%) |                 |
|-----------------------------------------------------|-------------------------------|-----------------|
|                                                     | 1% inoculation                | 10% inoculation |
| 5:0.5                                               | 5.4                           | 8.0             |
| 7.5:0.5                                             | 6.8                           | 7.9             |
| 10:0.5                                              | 7.4                           | 8.2             |

**Table S2. Elemental composition of fungal growth supernatant and minerals precipitated.**

| Sample                 | Elemental Composition (%) |       |      |       |
|------------------------|---------------------------|-------|------|-------|
|                        | C                         | N     | Ni   | O     |
| Fungal supernatant (S) | 52.97                     | 11.31 | -    | 35.72 |
| S + Ni <sup>2+</sup>   | 47.88                     | 16.85 | 4.51 | 30.76 |

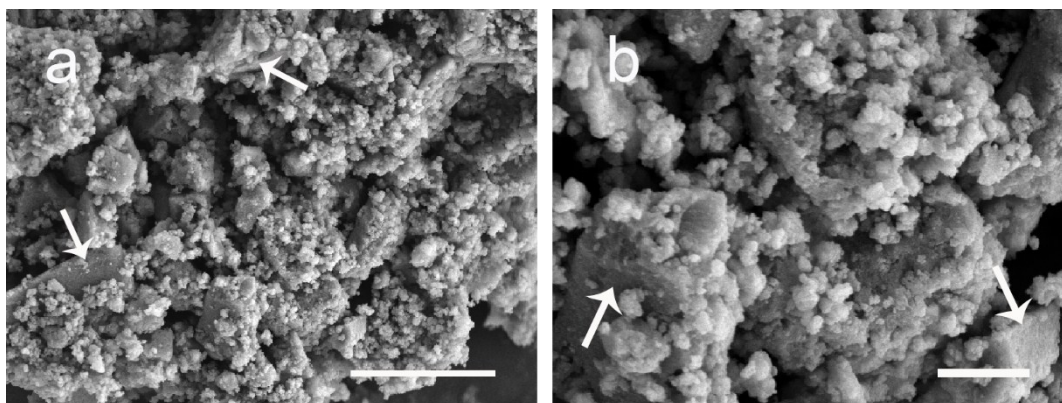

**Fig. S1. Scanning electron microscopy and elemental analysis of minerals precipitated by the mixture of  $\text{NiCl}_2$  and  $(\text{NH}_4)_2\text{CO}_3$ .**

Minerals were formed by mixture of 0.5 ml 50 mM  $\text{NiCl}_2$  and 10 ml AP1 medium containing (a) 33 mM, (b) 330 mM  $(\text{NH}_4)_2\text{CO}_3$ . Scale bars: (a) = 3  $\mu\text{m}$ , (b) = 600 nm.

### Reference

1. M. Dubois, K. A. Gilles, J. K. Hamilton, P. t. Rebers and F. Smith, *Anal Chem*, 1956, **28**, 350-356.
